# Supplementary material for: A sensitive one-step method for quantitative detection of α-amylase in serum and urine using a personal glucose meter
Source: Royal Society of Chemistry journal article supplement (doi:10.1039/c4an02033b), 2014-12-05
Supplement: c4an02033b1.pdf [file c4an02033b1.pdf]

## Electronic Supplementary Information

### A sensitive one-step method for quantitative detection of $\alpha$ -amylase in serum and urine using personal glucose meter

Qing Wang, Hui Wang, Xiaohai Yang,\* Kemin Wang,\* Rongjuan Liu, Qing Li and Jinqing Ou  
*State Key Laboratory of Chemo/Biosensing and Chemometrics, College of Chemistry and Chemical Engineering,  
Key Laboratory for Bio-Nanotechnology and Molecular Engineering of Hunan Province, Hunan University,  
Changsha 410082, China*

*E-mail: kmwang@hnu.edu.cn; yangxiaohai@hnu.edu.cn. Tel/Fax: +86 731 88821566.*

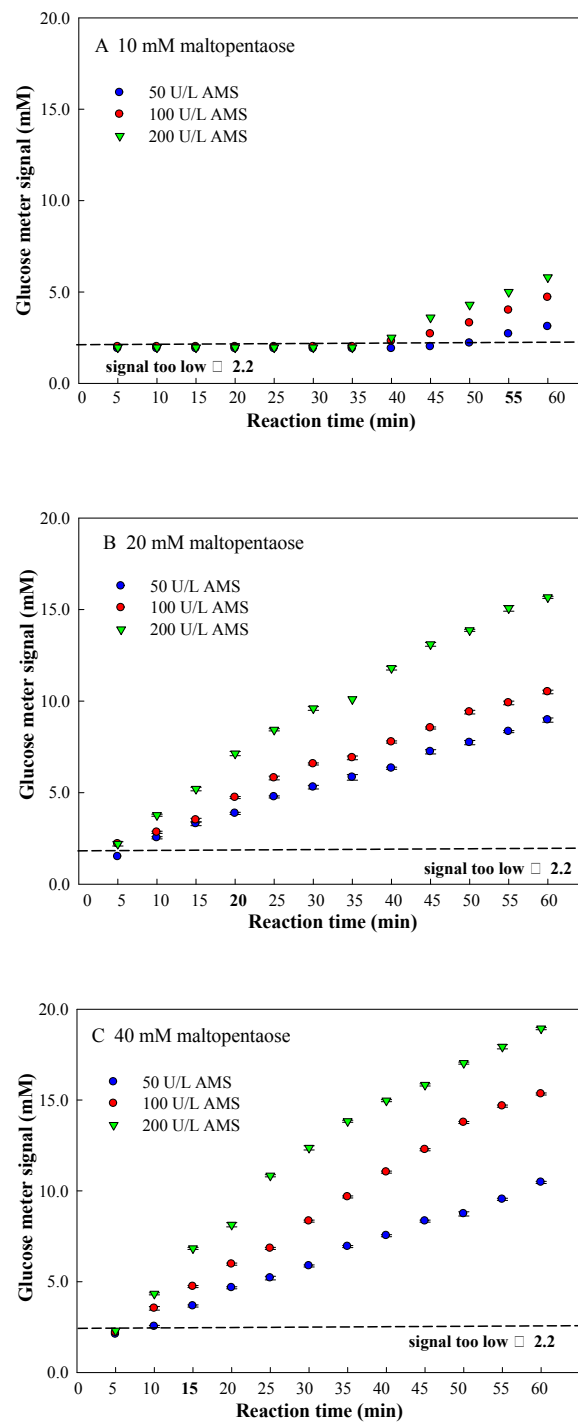

**Fig. S1** The effect of maltopentaose concentration.

The incubation temperature was 37 °C. The error bars represent the standard deviation of three measurements. A signal of PGM larger than 2.2 mM was regarded as signal.
